# Supplementary material
Source: Springer Nature journal article supplement (https://www.springermedizin.de/resource/supplementary/12979_2012_111_MOESM2_ESM.pdf/9603406)
Supplement: MOESM2 [file 9603406]

Breakfast:

Milk+ bread

Lunch:

50gr pasta+ vegetables

Dinner:

Eggs, chicken,  
legumes, +vegetables

Snacks:

No snacks

Others:

Wine, olives, olive oil, water
